# Supplementary material
Source: Springer Nature journal article supplement (https://www.springermedizin.de/resource/supplementary/12974_2007_107_MOESM2_ESM.pdf/9600786)

**A.**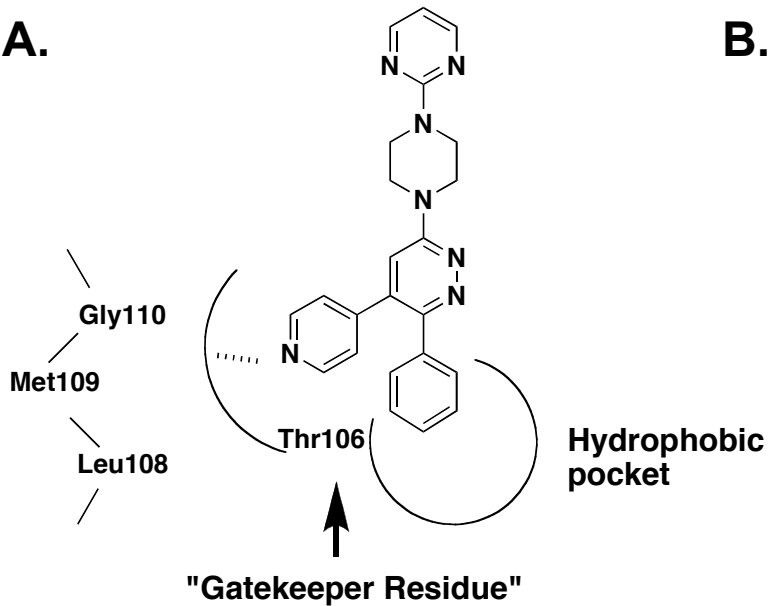**B.**

|              | 106  | 109    |
|--------------|------|--------|
| p38 $\alpha$ | VYLV | THLMGA |
| p38 $\beta$  | VYLV | TTLMGA |
| p38 $\delta$ | FYLV | MPFMQT |
| p38 $\gamma$ | FYLV | MPFMGT |

Supplement: MOESM2 [file 9600786]
